# Supplementary material
Source: publisher site journal article supplement (https://static.cambridge.org/content/id/urn:cambridge.org:id:article:S0020818314000423/resource/name/Appendix.pdf)
Supplement: Supplementary file 1 [file Appendix.pdf]

**Online Appendix for  
“Is the Phone Mightier than the Sword? Cell Phones and Insurgent Violence in Iraq”**

June 6, 2014

*Contents (listed in the order in which they are referenced in the main article)*

- A01. Figure: Cell phone-triggered IED
- A02. Figure: Card advertising the tip line in Iraq
- A03. Description of the expansion of Iraq’s cell phone network
- A04. Table: Descriptive statistics for the district-level data
- A05. Figure: Patterns of violence and network expansion across Iraq’s 30 most violent districts
- A06. Figure: National trends in violence and network expansion
- A07. Figure: Tower construction and violence in last six months of current year
- A08. Table: Relationship between violence and average month of tower introduction
- A09. Table: Descriptive statistics for the tower-level data
- A10. Table: Regression results with spatial lag
- A11. Figure: District-level effects over time
- A12. Checking for omitted variable bias in the tower-level results
- A13. Checking for the direct impact of violence on future tower construction
- A14. Checking for changes in insurgent effectiveness caused by cell phone coverage
- A15. Table: Dropping district/months once coverage hit 50 or 75th percentile of coverage
- A16. Table: District-level results by attack type and sectarian region
- A17. Table: Tower-level results dropping towers that introduce intermediate levels of coverage
- A18. Table: Tower-level results by attack type and period
- A19. Table: Tower-level geo-spatial spillovers

A01. Figure: Cell phone-triggered IED

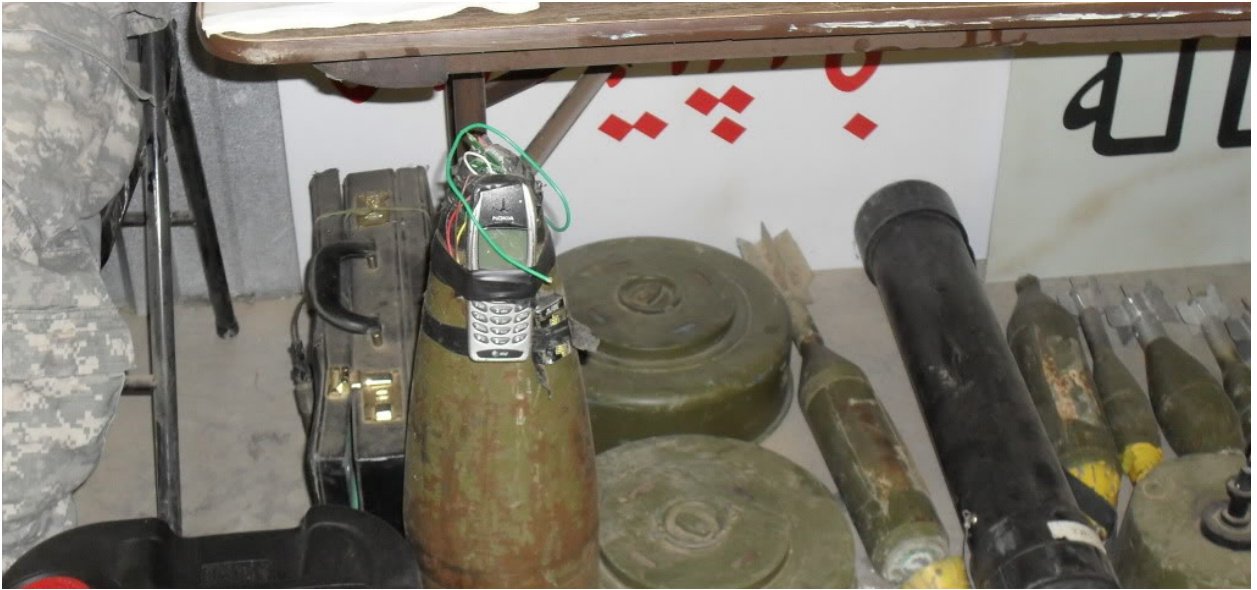

A02. Figure: Card advertising the tip line in Iraq

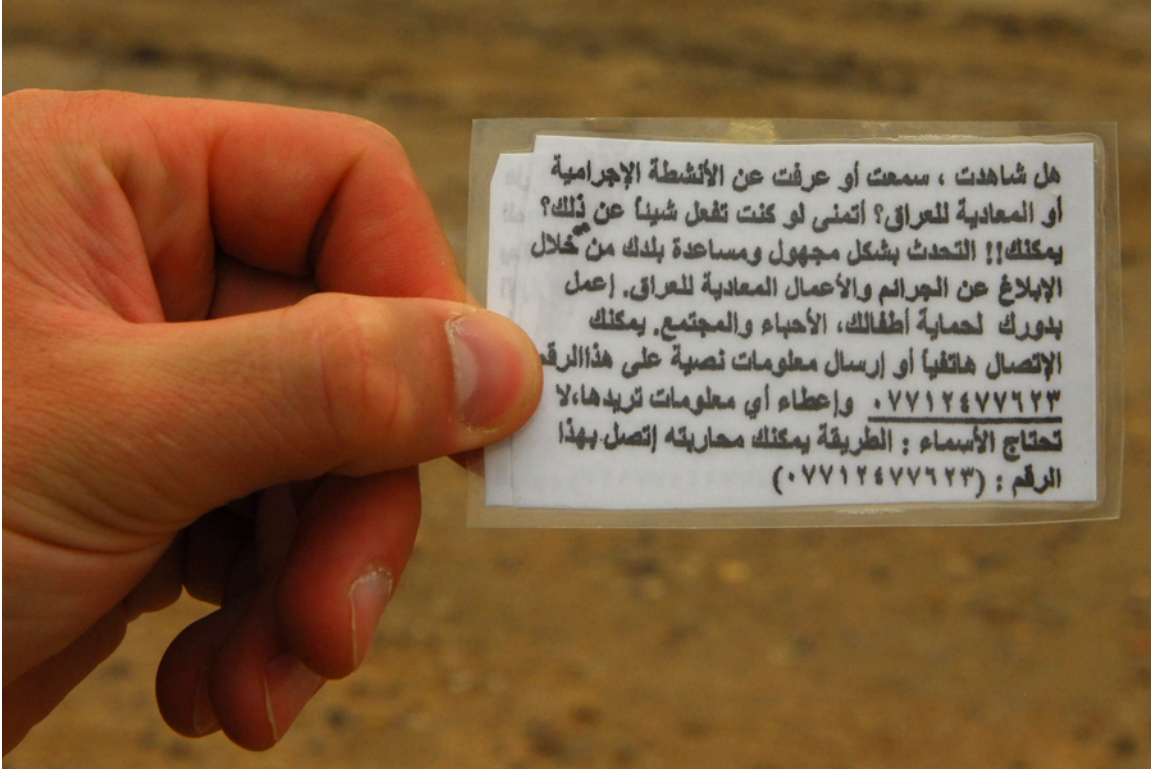

A card handed out by soldiers from the U.S. Army 3<sup>rd</sup> Infantry Division providing contact information for a government-run tip line. The card reads as follows:

“Have you seen, heard or become aware of criminal activities or those hostile to Iraq? Do you wish you could do something about it? You can!! Talk anonymously and help your country by giving news about crimes or actions hostile to Iraq. Fulfill your duty to take care of your children, your loved ones and society. You may phone or text to this number: 07712477623. Give any information you want, no names needed. The way YOU can fight is by calling this number: 07712477623.”

### **A03. Description of the expansion of Iraq's cell phone network**

Since our analysis exploits the expansion of the network in Iraq to assess cellular communications' effects on violence, a close look at the micro-dynamics of network expansion is necessary and provides crucial background for our identification strategy. The following description is based on extended conversations with MEC Gulf, a consulting firm that advises cell phone companies on network expansion, as well as the chief technology officers for *Zain Iraq* and *Asiacell*, two of the three major telecommunications providers in Iraq. It represents a consensus view, though details varied across firms, over time, and between projects.

Development of the cellular communications network in Iraq was based on a phased approach in which firms first selected larger areas for expansion, and then chose specific sites for cell phone towers within these areas based on the practicalities of providing coverage at minimum cost. For both Zain and Asiacell, areas for expansion were selected on an annual basis (towards the end of each company's fiscal year) based on three core criteria: requirements to meet service standards in existing areas as usage picked up; demand for cell phone service (large population without service); and contiguity with pre-existing coverage areas. An area chosen for expansion would typically be a large town, such as Fallujah, which first received coverage in 2004, or a semi-rural area with a large number of small communities.

Once these larger areas were selected, the radio-frequency (RF) design teams would map out a coverage plan that met a number of criteria including minimizing the number of towers while maximizing coverage and backhaul capacity. Two factors made their task more challenging in Iraq. First, the network backhaul in Iraq—the transmission of signals from the tower to a switch and then back out to the appropriate tower—occurred mostly via microwave as the country had no fiber optic network. Towers were therefore placed more closely together than in other settings to avoid interference from the microwave signals between towers.<sup>1</sup> Second, the pervasive use of jammers in Iraq by both Coalition forces and civilians meant that the providers needed to broadcast a stronger signal to guarantee coverage inside buildings than would be the case in normal urban settings.

Taking these constraints into account, the RF design teams would identify search rings of approximately one block radius in a number of locations within the targeted areas. Within these rings, a site selection team would then identify two or three potential sites that were

---

<sup>1</sup> The microwave signals between towers are highly directional. If towers were placed too far apart, there would be interference in those signals between towers, as the beam from one tower to the other would spread beyond the width of the receiving antenna.

suitable for tower installation. These would typically be buildings that had a relatively unobstructed view, but at the same time could support the weight of a cell phone antenna and the supporting equipment (generator). Once a list of candidate buildings had been put together, the respective proprietor of the building or the landowner would be contacted regarding a possible lease by the site acquisition team. If a search ring were deemed to be in an inaccessible area, then the RF design team would typically need to identify new search rings for multiple towers, not just the one initially sited in an inaccessible area. Typically, it would take two to three months for the market research process of identifying target expansion areas, about a month for the RF design, and then another two to three months from the establishment of the initial search rings to the completion of the final site list with sites secured, leased and ready to build. The setup of towers themselves would take anything from a couple of days (for rooftop sites) to a few weeks (for ground towers in more rural areas).

Figure 1 in the paper illustrates the expansion of the network graphically. Existing towers are shown in black, towers added in the respective year in red, and future towers in gray.

**A04. Table: Descriptive statistics for the district-level data**

| Variable                           | Observations | Mean  | Std. Dev. | Minimum | Maximum |
|------------------------------------|--------------|-------|-----------|---------|---------|
| <i>Panel A: Violence Variables</i> |              |       |           |         |         |
| SIGACTs / 100,000                  | 3,780        | 13.21 | 34.92     | 0       | 481     |
| Attacks / 100,000                  | 3,780        | 12.04 | 32.82     | 0       | 453     |
| Direct Fire / 100,000              | 3,780        | 3.25  | 10.26     | 0       | 156     |
| IED Attempts /100,000              | 3,780        | 6.91  | 19.76     | 0       | 311     |
| Sectarian Killings/100,000         | 3,780        | 1.79  | 6.63      | 0       | 170     |
| Targeted Killings/100,000          | 3,780        | 0.648 | 4.74      | 0       | 170     |
| <i>Panel B: Control Variables</i>  |              |       |           |         |         |
| New Towers                         | 3,780        | 0.519 | 1.833     | 0       | 35      |
| Total Towers Active                | 3,780        | 18.74 | 38.67     | 0       | 296     |
| Population (1000)                  | 3,780        | 327   | 320       | 11      | 1662    |
| Proportion Sunni                   | 3,780        | 0.243 | 0.355     | 0       | 1       |
| Proportion Shia                    | 3,780        | 0.742 | 0.371     | 0       | 1       |

Notes: Unit of analysis for violence is district/month, February '04 – January '09. Violent events based on data on MNF-I SIGACT-III database. Civilian casualty data from Iraq Body Count collaboration with ESOC. Cell tower data provided by Zain Iraq. Population data from LandScan (2008) gridded population data and WFP surveys (2003, 2005, and 2007). Analysis restricted to 63 districts in which Zain operated during period under study.

**A05. Figure: Patterns of violence and network expansion across Iraq's 20 most violent districts**

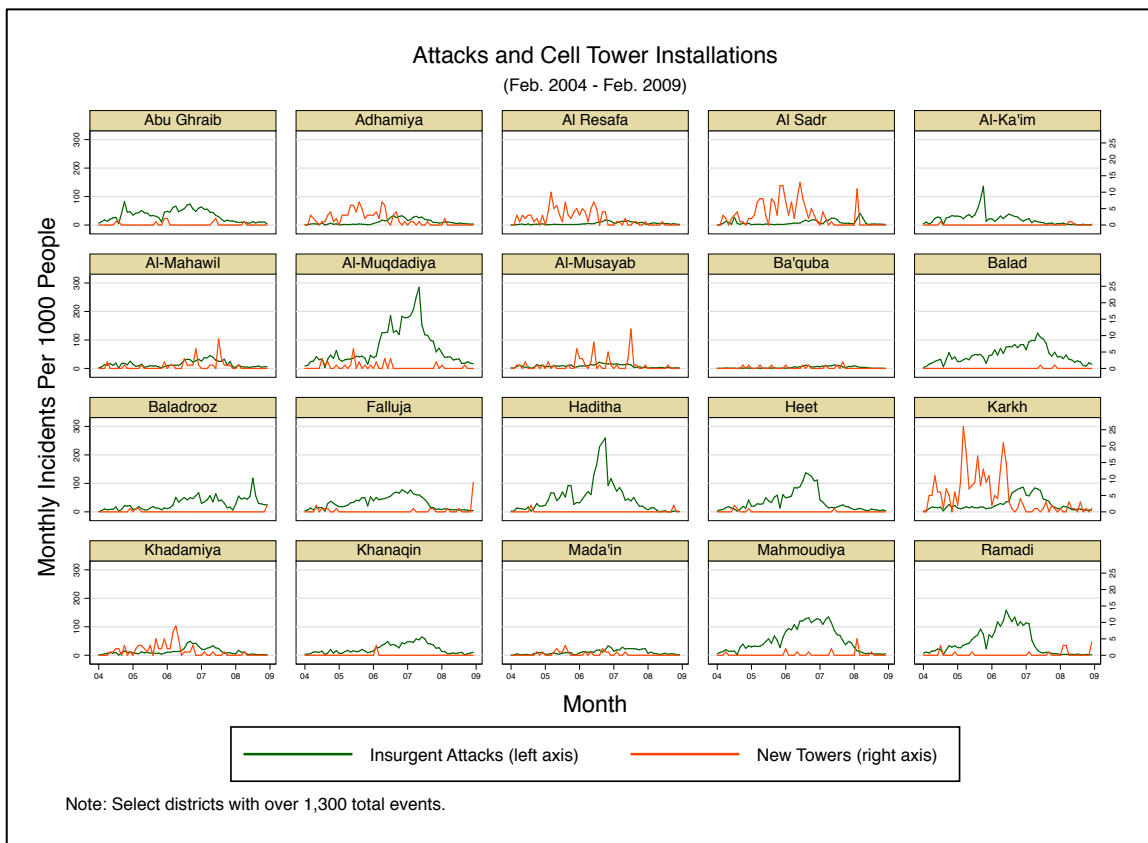

Note: Unit of analysis is the district month. Violence data are from MNF-I SIGACT-III database. Population data are from World Food Program Food Security and Vulnerability Analysis surveys fielded in 2004:I, 2005:II, and 2007:I. Data on cell phone tower installations provided by Zain Iraq. Tarmia dropped for scale reasons as it was major outlier on per-capita violence. Basrah dropped for scale as it had 35 towers installed in July 2006.

A06. Figure: National trends in violence and network expansion

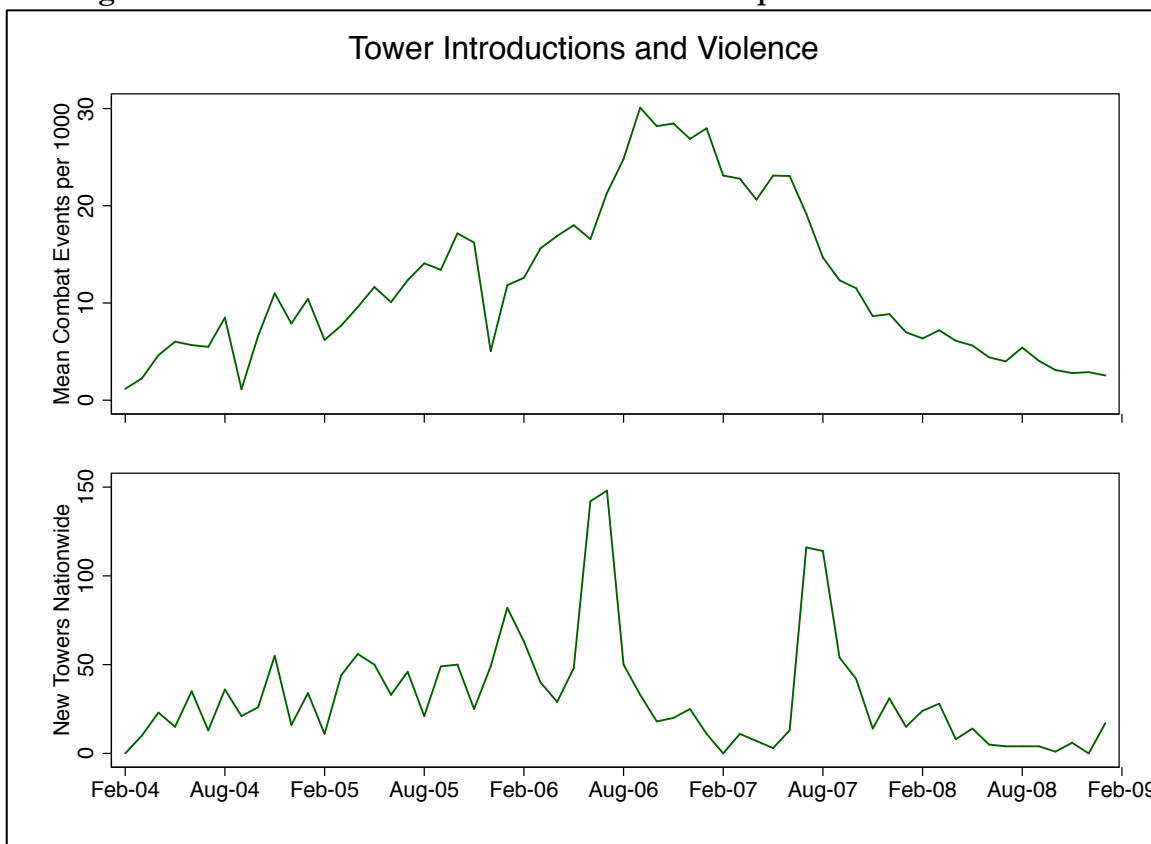

Note: Unit of analysis is the month. Violence data are from MNF-I SIGACT-III database. Population data are from World Food Program Food Security and Vulnerability Analysis surveys fielded in 2004:I, 2005:II, and 2007:I. Data on cell phone tower installations provided by Zain Iraq.



**A07. Figure: Relationship between Current Year Violence and Tower Construction at District Level**

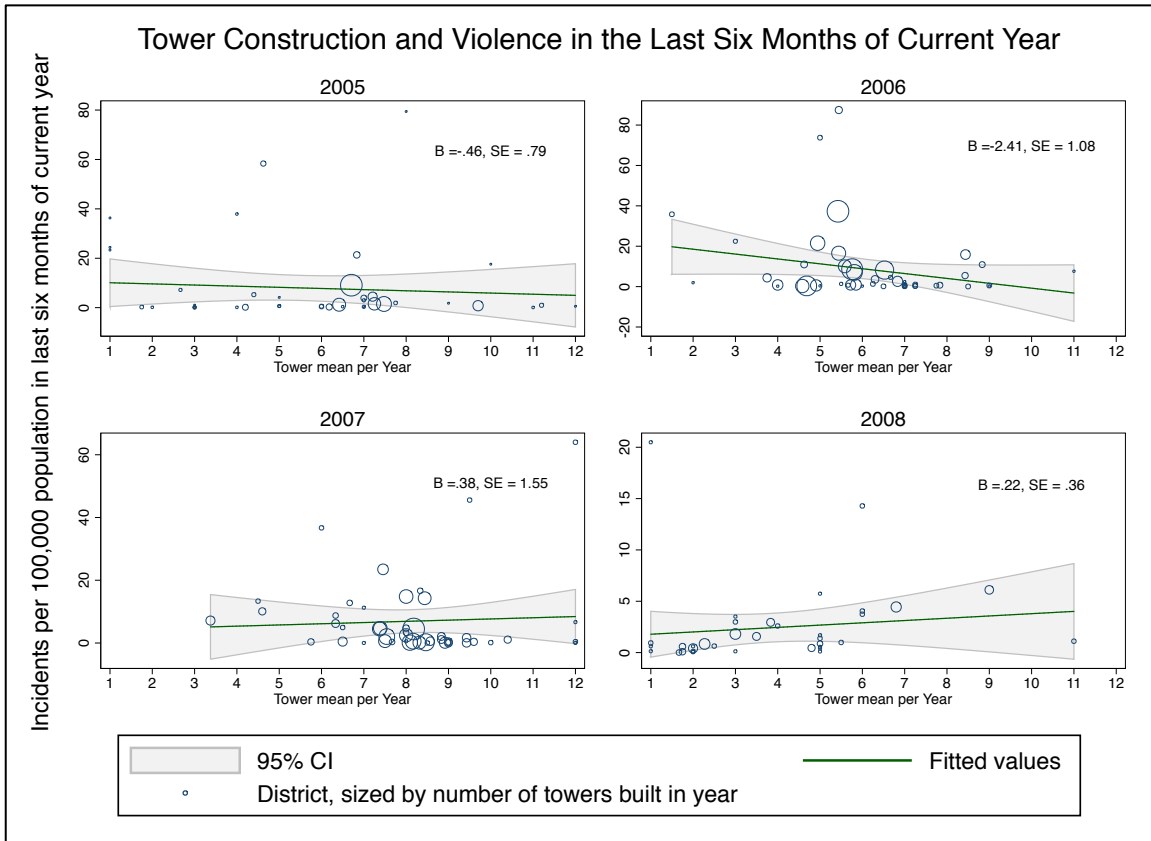

Note: Unit of analysis is the district. Violence data are from MNF-I SIGACT-III database. Data on cell phone tower installations provided by Zain Iraq. Population data from Landscan (2008) gridded population data.

**A08. Table: Relationship between violence and average month of tower introduction**

| Panel 1: DV = Aggregate Violence in July-December of Previous Year | Panel 1A: Bivariate Regression      | Full Sample                         | 2005              | 2006             | 2007               | 2008             |
|--------------------------------------------------------------------|-------------------------------------|-------------------------------------|-------------------|------------------|--------------------|------------------|
|                                                                    |                                     | July-December Violence              | 0.299<br>(0.55)   | 0.254<br>(0.38)  | -0.937*<br>(0.48)  | -1.034<br>(2.36) |
|                                                                    | Observations                        | 177                                 | 44                | 49               | 48                 | 36               |
|                                                                    | R-squared                           | 0.00                                | 0.01              | 0.09             | 0.01               | 0.04             |
| Panel 1B: Sect Fixed Effects                                       |                                     |                                     |                   |                  |                    |                  |
|                                                                    | July-December Violence              | 0.219<br>(0.46)                     | 0.283<br>(0.19)   | -0.731<br>(0.79) | -0.250<br>(2.15)   | -2.138<br>(3.01) |
|                                                                    | Observations                        | 177                                 | 44                | 49               | 48                 | 36               |
|                                                                    | R-squared                           | 0.32                                | 0.39              | 0.44             | 0.49               | 0.42             |
| Panel 2: DV = Aggregate Violence in January-July of Current Year   | Panel 2A: Bivariate Regression      | Full Sample                         | 2005              | 2006             | 2007               | 2008             |
|                                                                    |                                     | January-June Violence               | 0.662<br>(0.63)   | 0.143<br>(0.54)  | -1.721*<br>(0.87)  | 0.663<br>(3.09)  |
|                                                                    | Observations                        | 177                                 | 44                | 49               | 48                 | 36               |
|                                                                    | R-squared                           | 0.01                                | 0.00              | 0.08             | 0.00               | 0.11             |
| Panel 2B: Sect Fixed Effects                                       |                                     |                                     |                   |                  |                    |                  |
|                                                                    | January-June Violence               | 0.593<br>(0.68)                     | 0.296<br>(0.32)   | -1.342<br>(1.46) | 2.015<br>(3.02)    | -0.279<br>(0.69) |
|                                                                    | Observations                        | 177                                 | 44                | 49               | 48                 | 36               |
|                                                                    | R-squared                           | 0.29                                | 0.47              | 0.44             | 0.39               | 0.44             |
| Panel 3: DV = Aggregate Violence in July-December of Current Year  | Panel 3A: Bivariate Regression      | Full Sample                         | 2005              | 2006             | 2007               | 2008             |
|                                                                    |                                     | July-December Current Year Violence | -0.0707<br>(0.40) | -0.465<br>(0.79) | -2.413**<br>(1.09) | 0.383<br>(1.55)  |
|                                                                    | Observations                        | 177                                 | 44                | 49               | 48                 | 36               |
|                                                                    | R-squared                           | 0.00                                | 0.01              | 0.06             | 0.00               | 0.02             |
| Panel 3B: Fixed Effects                                            |                                     |                                     |                   |                  |                    |                  |
|                                                                    | July-December Current Year Violence | -0.141<br>(0.32)                    | -0.157<br>(0.40)  | -1.829<br>(2.01) | 0.874<br>(1.56)    | -0.614<br>(0.81) |
|                                                                    | Observations                        | 177                                 | 44                | 49               | 48                 | 36               |
|                                                                    | R-squared                           | 0.29                                | 0.56              | 0.47             | 0.36               | 0.40             |

Note: Robust standard errors in parentheses for all regressions, clustered by sectarian region for regressions with sect fixed-effects. Sect fixed effects account for distinct mean levels of violence in 9 Sunni/Kurd districts, 13 mixed districts, and 41 majority Shia districts. 75 of 252 district-years had no towers introduced and so are not included in regressions, representing 40 different districts of which 9 are predominantly Sunni or Kurdish, 7 are mixed, and 24 are predominantly Shia. Constants not reported. \*\*\* p<0.01, \*\* p<0.05, \* p<0.1.

**A09. Table: Descriptive statistics for the tower-level data (15-day periods)**

| Variable                                                        | Observations | Mean    | Std. Dev. | Minimum | Maximum   |
|-----------------------------------------------------------------|--------------|---------|-----------|---------|-----------|
| <i>Panel A: Violence Variables – Full Sample</i>                |              |         |           |         |           |
| SIGACTs                                                         | 29,744       | 8.94    | 15.20     | 0       | 224       |
| Direct Fire                                                     | 29,744       | 3.60    | 7.15      | 0       | 127       |
| Indirect Fire                                                   | 29,744       | 0.40    | 1.89      | 0       | 50        |
| IEDs                                                            | 29,744       | 4.09    | 7.39      | 0       | 127       |
| <i>Panel B: Tower Areas Characteristics – Full Sample</i>       |              |         |           |         |           |
| Area (km <sup>2</sup> )                                         | 1,859        | 88.7    | 118       | 50      | 449       |
| Proportion New                                                  | 1,859        | 0.13    | 0.28      | 0       | 1         |
| Population                                                      | 1,859        | 354,041 | 308,394   | 0       | 1,445,185 |
| Proportion Urban                                                | 1,859        | 0.92    | 0.27      | 0       | 1         |
| Proportion Sunni                                                | 1,859        | 0.22    | 0.26      | 0       | 1         |
| Proportion Shia                                                 | 1,859        | 0.78    | 0.26      | 0       | 1         |
| <i>Panel C: Violence Variables – Less than 50% New</i>          |              |         |           |         |           |
| SIGACTs                                                         | 26,368       | 9.87    | 15.77     | 0       | 224       |
| Direct Fire                                                     | 26,368       | 4.00    | 7.46      | 0       | 127       |
| Indirect Fire                                                   | 26,368       | 0.44    | 1.99      | 0       | 50        |
| IEDs                                                            | 26,368       | 4.50    | 7.68      | 0       | 127       |
| <i>Panel D: Tower Areas Characteristics – Less than 50% New</i> |              |         |           |         |           |
| Area (km <sup>2</sup> )                                         | 1,648        | 67.40   | 81.67     | 49.9    | 449       |
| Proportion New                                                  | 1,648        | 0.03    | 0.08      | 0       | 0.49      |
| Population                                                      | 1,648        | 394,147 | 303,957   | 3,770   | 1,445,185 |
| Proportion Urban                                                | 1,648        | 0.97    | 0.19      | 0       | 1         |
| Proportion Sunni                                                | 1,648        | 0.22    | 0.24      | 0       | 1         |
| Proportion Shia                                                 | 1,648        | 0.78    | 0.24      | 0       | 1         |
| <i>Panel E: Violence Variables – More than 50% New</i>          |              |         |           |         |           |
| SIGACTs                                                         | 3,376        | 1.68    | 5.77      | 0       | 78        |
| Direct Fire                                                     | 3,376        | 0.53    | 2.15      | 0       | 33        |
| Indirect Fire                                                   | 3,376        | 0.12    | 0.76      | 0       | 17        |
| IEDs                                                            | 3,376        | 0.89    | 3.04      | 0       | 42        |
| <i>Panel F: Tower Areas Characteristics – More than 50% New</i> |              |         |           |         |           |
| Area (km <sup>2</sup> )                                         | 211          | 255.4   | 200.2     | 49.9    | 449       |
| Proportion New                                                  | 211          | 0.87    | 0.16      | 0.50    | 1         |
| Population                                                      | 211          | 39,113  | 68,149    | 0       | 496943.00 |
| Proportion Urban                                                | 211          | 0.54    | 0.50      | 0       | 1         |
| Proportion Sunni                                                | 211          | 0.25    | 0.38      | 0       | 1         |
| Proportion Shia                                                 | 211          | 0.74    | 0.38      | 0       | 1         |

Notes: Unit of analysis for violence is tower/15-day period. Tower coverage areas created by a 4km radius around cell phone towers in urban areas and 12km radius in rural areas. Violent events based on data on MNF-I SIGACT-III database. Cell tower data provided by Zain Iraq. Population data from LandScan (2008) and gridded population data. Includes only towers with at least 8 periods before and after onair date.

**A10. Table: Regression results with spatial lag**

|                          | (1)                   | (2)                   | (3)                   | (4)                   | (5)                   | (6)                   | (7)                   |
|--------------------------|-----------------------|-----------------------|-----------------------|-----------------------|-----------------------|-----------------------|-----------------------|
| Dependent Variable:      | FD of SIG /100,000    |                       |                       |                       |                       |                       |                       |
| Lagged FD of Tower Count | -0.0719<br>(0.048)    | -0.0812<br>(0.049)    | -0.108*<br>(0.056)    | -0.140**<br>(0.069)   | -0.0841<br>(0.054)    | -0.0916<br>(0.056)    | -0.180*<br>(0.097)    |
| Existing Tower Count     | 0.0384***<br>(0.0091) | 0.0379***<br>(0.0090) | 0.0323***<br>(0.0079) | 0.0323***<br>(0.0080) | 0.0366***<br>(0.0083) | 0.0341***<br>(0.0080) | 0.0344***<br>(0.0087) |
| Observations             | 3654                  | 3654                  | 3654                  | 3654                  | 3654                  | 3654                  | 3654                  |
| R-squared                | 0.09                  | 0.10                  | 0.12                  | 0.12                  | 0.10                  | 0.12                  | 0.14                  |
| Time FE                  | Half                  | Quarter               | Month                 | Month                 | Sect X<br>Half        | Sect X<br>Quarter     | Province<br>X Quarter |
| Space FE                 | No                    | No                    | No                    | District              | No                    | No                    | No                    |
| First Differences        | Yes                   |

Notes: Analysis restricted to 63 districts in which Zain Iraq operated during period under study. Robust standard errors, clustered at the district level in parentheses. Spatial lags are total of given variable in neighboring districts, Each model's fixed effects are noted. Estimates which are significant at the 0.05 (0.10, 0.01) level are marked with at \*\* (\*, \*\*\*). Violent events based on data on MNF-I SIGACT-III database. Cell tower data provided by Zain Iraq. Population data from LandScan (2008) gridded population data and WFP surveys (2003, 2005, and 2007).

**A11. Figure: Duration of District/Month Effects**

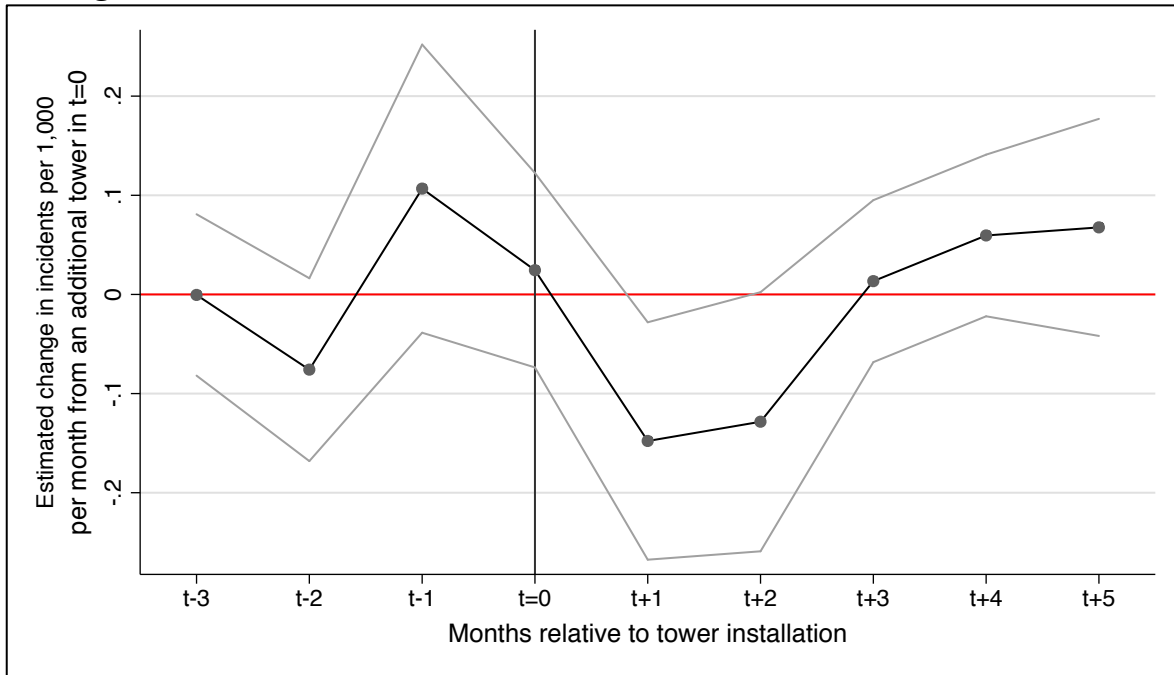

Notes: Coefficient estimates and 90% confidence interval from estimating equation 1 on various leads and lags of changes in SIGACTs per 1,000 population. Analysis restricted to 63 districts in which Zain Iraq operated during period under study. Robust standard errors, clustered at the district level calculated. Violent events based on data on MNF-I SIGACT-III database. Cell tower data provided by Zain Iraq. Population data from LandScan (2008) gridded population data and WFP surveys (2003, 2005, and 2007).

## A12. Checking for omitted variable bias in the tower-level results

To enhance our confidence that our results are not driven by omitted variables we use temporal and geographic placebo tests. Table A12A below places the number of new towers introduced in the next month on the RHS (the lead difference) and Table A12B places the number of towers introduced in neighboring districts on the RHS (the spatial lag of the lagged difference). None of the coefficients are significant in the differenced specifications, providing additional confidence that the combination of differencing and fixed effects in Table 1 properly identify the impact of tower construction at the district-month level.

Table A12A. Temporal Placebo Test of Impact of Increased Cell Phone Coverage on Total Attacks

|                        | (1)               | (2)                | (3)               | (4)               | (5)                 | (6)                | (7)                   |
|------------------------|-------------------|--------------------|-------------------|-------------------|---------------------|--------------------|-----------------------|
| Dependent Variable:    | FD of SIG         | FD of SIG          | FD of SIG         | FD of SIG         | FD of SIG           | FD of SIG          | FD of SIG             |
|                        | /100,000          | /100,000           | /100,000          | /100,000          | /100,000            | /100,000           | /100,000              |
| Lead FD of Tower Count | 0.0148<br>(0.048) | 0.00348<br>(0.052) | 0.0728<br>(0.064) | 0.0948<br>(0.081) | -0.00794<br>(0.050) | -0.0351<br>(0.053) | -0.115<br>(0.10)      |
| Observations           | 3654              | 3654               | 3654              | 3654              | 3654                | 3654               | 3654                  |
| R-squared              | 0.01              | 0.02               | 0.07              | 0.07              | 0.05                | 0.07               | 0.09                  |
| Time FE                | Half              | Quarter            | Month             | Month             | Sect X<br>Half      | Sect X<br>Quarter  | Province<br>X Quarter |
| Space FE               | No                | No                 | No                | District          | No                  | No                 | No                    |
| First Differences      | Yes               | Yes                | Yes               | Yes               | Yes                 | Yes                | Yes                   |

Notes: Analysis restricted to 63 districts in which Zain Iraq operated during period under study. Robust standard errors, clustered at the district level in parentheses. Each model's fixed effects are noted. Estimates which are significant at the 0.05 (0.10, 0.01) level are marked with at \*\* (\*, \*\*\*). Violent events based on data on MNF-I SIGACT-III database. Cell tower data provided by Zain Iraq. Population data from LandScan (2008) gridded population data and WFP surveys (2003, 2005, and 2007).

Table A12B. Geographic Placebo Test of Impact of Increased Cell Phone Coverage on Total Attacks

| Dependent Variable:                               | (1)<br>FD of<br>SIG<br>/100,000 | (2)<br>FD of<br>SIG<br>/100,000 | (3)<br>FD of<br>SIG<br>/100,000 | (4)<br>FD of<br>SIG<br>/100,000 | (5)<br>FD of<br>SIG<br>/100,000 | (6)<br>FD of<br>SIG<br>/100,000 | (7)<br>FD of<br>SIG<br>/100,000 |
|---------------------------------------------------|---------------------------------|---------------------------------|---------------------------------|---------------------------------|---------------------------------|---------------------------------|---------------------------------|
| Lagged FD of Tower Count in Neighboring Districts | -0.158<br>(0.14)                | -0.185<br>(0.19)                | -0.217<br>(0.25)                | -0.285<br>(0.34)                | -0.126<br>(0.16)                | -0.106<br>(0.16)                | -0.236<br>(0.42)                |
| Observations                                      | 3654                            | 3654                            | 3654                            | 3654                            | 3654                            | 3654                            | 3654                            |
| R-squared                                         | 0.01                            | 0.02                            | 0.12                            | 0.12                            | 0.04                            | 0.07                            | 0.07                            |
| Time FE                                           | Half                            | Quarter                         | Month                           | Month                           | Sect X<br>Half                  | Sect X<br>Quarter               | Province<br>X Quarter           |
| Space FE                                          | No                              | No                              | No                              | District                        | No                              | No                              | No                              |
| First Differences                                 | Yes                             |

Notes: Analysis restricted to 63 districts in which Zain Iraq operated during period under study. Robust standard errors, clustered at the district level in parentheses. Each model's fixed effects are noted. Estimates which are significant at the 0.05 (0.10, 0.01) level are marked with at \*\* (\*, \*\*\*). Violent events based on data on MNF-I SIGACT-III database. Cell tower data provided by Zain Iraq. Population data from LandScan (2008) gridded population data and WFP surveys (2003, 2005, and 2007).

### **A13. Checking for the direct impact of violence on future tower construction**

While we argued that there should be little impact of violence on future tower construction given that the cell phone providers reported insurgent violence did not interfere with tower construction, violence might impact tower construction in less direct ways. The providers reported that the main source of month-to-month delays in tower construction arose from the need to secure clear title to properties before building. Past sectarian violence, which is weakly correlated with insurgent attacks ( $\rho = .203$ ), clearly drove population movements which likely made it harder to secure clear title to desired tower locations, thereby delaying tower construction. If that dynamic introduced bias into our estimates we should find that controlling for various kinds of sectarian violence alters the results. Table A13 shows this is not the case. Panel (A) reports the core specification of columns (6 and 7) from table (2), Panel (B) controls for total sectarian violence in a number of ways, and Panel (C) controls for targeted killings by sectarian organizations. None of the controls significantly alter our estimates of the impact of cellular coverage, providing additional confidence in the estimates in Table 1.



Table A13. Impact of Increased Cell Phone Coverage on Total Attacks controlling for Past Sectarian Violence

| Dependent Variable: First Differences in SIGACTs/100,000 | (1)                                 | (2)                 | (3)                                                   | (4)                | (5)                 | (6)                                                                  | (7)                 | (8)                 |
|----------------------------------------------------------|-------------------------------------|---------------------|-------------------------------------------------------|--------------------|---------------------|----------------------------------------------------------------------|---------------------|---------------------|
|                                                          | <i>Panel A: Core Specifications</i> |                     | <i>Panel B: Controls for Total Sectarian Violence</i> |                    |                     | <i>Panel B: Controls for Targeted Killings by Sectarian Militias</i> |                     |                     |
| Lagged FD of Towers                                      | -0.116**<br>(0.056)                 | -0.151**<br>(0.070) | -0.143**<br>(0.070)                                   | -0.137*<br>(0.069) | -0.166**<br>(0.072) | -0.146**<br>(0.071)                                                  | -0.144**<br>(0.071) | -0.167**<br>(0.073) |
| FD of Sectarian Violence                                 | 0.0259<br>(0.031)                   | 0.0260<br>(0.031)   | 0.00946<br>(0.048)                                    | -0.0392<br>(0.051) |                     | 0.0273<br>(0.045)                                                    | -0.0307<br>(0.061)  |                     |
| Lagged FD of Sectarian Violence                          |                                     |                     | -0.0347<br>(0.047)                                    | -0.112<br>(0.072)  |                     | 0.00724<br>(0.055)                                                   | -0.0797<br>(0.098)  |                     |
| Second Lag FD of Sectarian Violence                      |                                     |                     |                                                       | -0.114<br>(0.069)  |                     |                                                                      | -0.117<br>(0.084)   |                     |
| Sectarian Violence 3-Month Lagged Moving Average Lag     |                                     |                     |                                                       |                    | -0.143**<br>(0.066) |                                                                      |                     | -0.209<br>(0.15)    |
| Observations                                             | 3717                                | 3717                | 3717                                                  | 3654               | 3654                | 3654                                                                 | 3654                | 3654                |
| R-squared                                                | 0.28                                | 0.28                | 0.31                                                  | 0.01               | 0.01                | 0.03                                                                 | 0.06                | 0.07                |
| Time FE                                                  | Month                               | Month               | Month                                                 | Month              | Month               | Month                                                                | Month               | Month               |
| Space FE                                                 | No                                  | District            | District                                              | District           | District            | District                                                             | District            | District            |
| Sectarian FE                                             | Yes                                 | Yes                 | 2 Lags                                                | 3 Lags             | Lagged Moving Avg.  | 2 Lags                                                               | 3 Lags              | Lagged Moving Avg.  |
| First Differences                                        | Yes                                 | Yes                 | Yes                                                   | Yes                | Yes                 | Yes                                                                  | Yes                 | Yes                 |

Notes: Analysis restricted to 63 districts in which Zain Iraq operated during period under study. Robust standard errors, clustered at the district level in parentheses. Each model's fixed effects are noted. Estimates which are significant at the 0.05 (0.10, 0.01) level are marked with at \*\* (\*, \*\*\*). Violent events based on data on MNF-I SIGACT-III database.

#### **A14. Checking for changes in insurgent effectiveness caused by cell phone coverage**

Another possibility, that insurgents trade quality for quantity when coverage increases, does not impact the validity of our net reduced form estimates, but does raise the issue of what the results imply. If cell phone coverage allows insurgents to be more effective with fewer attacks, then the policy implications of our findings are the opposite of what a more straightforward interpretation would suggest. The question is thus whether enhanced coverage allows insurgent to substitute quantity for quality at rates that should call into question the assessment that fewer attacks indicate a harder operating environment for insurgents.

Unfortunately, checking for such substitution is not possible at the district-month level, as the SIGACT data do not include information on the consequences of attacks. What we can do is check whether there is substantial variation in the correlation between attack rates and casualty rates at the provincial level using the iCasualties.org data which give monthly figures for U.S. forces killed by province.<sup>2</sup> It turns out there is very little change over time in that relationship. The bivariate monthly correlation between total attacks and casualties is quite high, .61 for the entire period, and remains similarly strong by year, ranging from .51 in 2005 to .80 in 2007. Once we account for regional differences by using province fixed effects in a regression framework, the conditional correlation between casualties and total attacks is positive but statistically insignificant and does not change over time.<sup>3</sup> This consistency is hard to square with strong substitution effects, making us relatively confident that the reduced form relationship we identify shows that increased coverage makes it harder for insurgents to conduct attacks.

---

<sup>2</sup> For various tabulations of the data see [www.iCasualties.org](http://www.iCasualties.org). We thank Radha Iyengar for providing these data in a readily usable Stata file.

<sup>3</sup> Formally, we allow the slope of the casualty-incident relationship to vary by year using interaction terms and find no statistically meaningful slope shifts by year.

**A15. Table: District-level results dropping district/months with high coverage**

| Dependent Variable:<br>Attacks/100,000                                                          | (1)<br>All<br>Attacks | (2)<br>Direct<br>Fire | (3)<br>Indirect<br>Attacks | (4)<br>IED<br>Attempts | (5)<br>IEDs Cleared<br>/ Total<br>Attempts |
|-------------------------------------------------------------------------------------------------|-----------------------|-----------------------|----------------------------|------------------------|--------------------------------------------|
| <i>Panel A: Dropping districts once coverage reaches 75<sup>th</sup> percentile of coverage</i> |                       |                       |                            |                        |                                            |
| Tower First Differences                                                                         | -0.31**<br>(0.14)     | -0.14**<br>(0.069)    | 0.031*<br>(0.016)          | -0.17**<br>(0.081)     | 0.0022<br>(0.0089)                         |
| Observations                                                                                    | 2741                  | 2741                  | 2741                       | 2741                   | 1011                                       |
| R-squared                                                                                       | 0.09                  | 0.04                  | 0.10                       | 0.06                   | 0.02                                       |
| <i>Panel B: Dropping districts once coverage reaches 50<sup>th</sup> percentile of coverage</i> |                       |                       |                            |                        |                                            |
| Tower First Differences                                                                         | -0.49**<br>(0.22)     | -0.27**<br>(0.12)     | 0.094**<br>(0.045)         | -0.22<br>(0.13)        | 0.0062<br>(0.017)                          |
| Observations                                                                                    | 1830                  | 1830                  | 1830                       | 1830                   | 480                                        |
| R-squared                                                                                       | 0.10                  | 0.07                  | 0.12                       | 0.07                   | 0.06                                       |

Notes: Analysis restricted to 63 districts in which Zain operated during period under study. Robust standard errors, clustered at the district level in parentheses. All results include month and district fixed effects. Estimates which are significant at the 0.05 (0.10, 0.01) level are marked with at \*\* (\*, \*\*\*). Column (5) calculated only for period after September 2006 when data distinguish successful and failed IED attacks.

**A16. Table: District-level results by attack type and sectarian region**

| Dependent Variable:<br>Attacks/100,000         | (1)<br>All Attacks  | (2)<br>Direct Fire  | (3)<br>Indirect Attacks | (4)<br>IED Attempts | (5)<br>IEDs Cleared / Total Attempts |
|------------------------------------------------|---------------------|---------------------|-------------------------|---------------------|--------------------------------------|
| <i>Panel A: Mixed Areas</i>                    |                     |                     |                         |                     |                                      |
| Tower First Differences                        | -0.251<br>(0.19)    | -0.0836<br>(0.077)  | -0.0007<br>(0.0068)     | -0.133<br>(0.091)   | 0.0096<br>(0.011)                    |
| Observations                                   | 580                 | 580                 | 580                     | 580                 | 580                                  |
| R-squared                                      | 0.30                | 0.24                | 0.35                    | 0.25                | 0.10                                 |
| <i>Panel B: Kurdish/Shia Areas</i>             |                     |                     |                         |                     |                                      |
| Tower First Differences                        | -0.00960<br>(0.058) | -0.00668<br>(0.027) | 0.00144<br>(0.0074)     | 0.0237<br>(0.020)   | -0.0010<br>(0.005)                   |
| Observations                                   | 2436                | 2436                | 2436                    | 2436                | 1134                                 |
| R-squared                                      | 0.10                | 0.08                | 0.10                    | 0.04                | 0.04                                 |
| <i>Panel C: Sunni Areas</i>                    |                     |                     |                         |                     |                                      |
| Tower First Differences                        | -2.259*<br>(1.07)   | -0.877**<br>(0.39)  | 0.133<br>(0.13)         | -1.048<br>(0.71)    | -0.0612<br>(0.034)                   |
| Observations                                   | 638                 | 638                 | 638                     | 638                 | 297                                  |
| R-squared                                      | 0.23                | 0.10                | 0.21                    | 0.21                | 0.12                                 |
| <i>Panel D: Mixed and Sunni Areas Combined</i> |                     |                     |                         |                     |                                      |
| Tower First Differences                        | -0.496<br>(0.29)    | -0.158<br>(0.12)    | 0.0130<br>(0.015)       | -0.315*<br>(0.16)   | -0.0035<br>(0.012)                   |
| Observations                                   | 1218                | 1218                | 1218                    | 1218                | 567                                  |
| R-squared                                      | 0.18                | 0.08                | 0.16                    | 0.15                | 0.04                                 |

Notes: Analysis restricted to 63 districts in which Zain operated during period under study. Robust standard errors, clustered at the district level in parentheses. All results include month and district fixed effects. Estimates which are significant at the 0.05 (0.10, 0.01) level are marked with at \*\* (\*, \*\*\*). Column (5) calculated only for period after September 2006 when data distinguish successful and failed IED attacks.

A17: Table: Impact of Introducing Cellular Communications for Tower Areas Dropping Intermediate Areas.

| <i>Panel A: Dropping Areas Between 10% and the Threshold – Counterfactual Excludes Towers Adding Between 10% and Threshold</i> |                    |                    |                    |                   |                    |                   |                    |                   |                   |
|--------------------------------------------------------------------------------------------------------------------------------|--------------------|--------------------|--------------------|-------------------|--------------------|-------------------|--------------------|-------------------|-------------------|
| Coverage Threshold for 'New' Towers                                                                                            | (1)                | (2)                | (3)                | (4)               | (5)                | (6)               | (7)                | (8)               | (9)               |
|                                                                                                                                | 10%                | 20%                | 30%                | 40%               | 50%                | 60%               | 70%                | 80%               | 90%               |
| <i>Post</i>                                                                                                                    | -0.068<br>(0.20)   | -0.13<br>(0.20)    | -0.14<br>(0.21)    | -0.16<br>(0.21)   | -0.14<br>(0.21)    | -0.15<br>(0.21)   | -0.16<br>(0.21)    | -0.16<br>(0.21)   | -0.17<br>(0.21)   |
| <i>Post*New</i>                                                                                                                | -1.07***<br>(0.32) | -0.99***<br>(0.38) | -0.98**<br>(0.41)  | -0.74**<br>(0.36) | -0.83**<br>(0.34)  | -0.78**<br>(0.36) | -0.80**<br>(0.37)  | -0.79**<br>(0.38) | -0.71*<br>(0.43)  |
| Observations                                                                                                                   | 29,744             | 28,192             | 27,600             | 27,328            | 26,848             | 26,416            | 26,176             | 25,968            | 25,424            |
| Number of Towers                                                                                                               | 1,859              | 1762               | 1725               | 1708              | 1678               | 1651              | 1636               | 1623              | 1589              |
| R-squared                                                                                                                      | 0.75               | 0.75               | 0.75               | 0.75              | 0.74               | 0.74              | 0.74               | 0.74              | 0.74              |
| <i>Panel B: Dropping Areas Between 0% and the Threshold – Counterfactual is Excludes Towers Adding Any New Coverage</i>        |                    |                    |                    |                   |                    |                   |                    |                   |                   |
| <i>Post</i>                                                                                                                    | 0.11<br>(0.25)     | 0.020<br>(0.25)    | 0.0037<br>(0.26)   | -0.028<br>(0.26)  | -0.0026<br>(0.26)  | -0.012<br>(0.26)  | -0.016<br>(0.26)   | -0.022<br>(0.26)  | -0.042<br>(0.26)  |
| <i>Post*New</i>                                                                                                                | -1.37***<br>(0.36) | -1.30***<br>(0.42) | -1.29***<br>(0.46) | -1.03**<br>(0.42) | -1.13***<br>(0.40) | -1.08**<br>(0.42) | -1.13***<br>(0.43) | -1.12**<br>(0.44) | -1.05**<br>(0.50) |
| Observations                                                                                                                   | 24,528             | 22,976             | 22,384             | 22,112            | 21,632             | 21,200            | 20,960             | 20,752            | 20,208            |
| Number of Towers                                                                                                               | 1533               | 1436               | 1399               | 1382              | 1352               | 1325              | 1310               | 1297              | 1263              |
| R-squared                                                                                                                      | 0.75               | 0.75               | 0.75               | 0.75              | 0.73               | 0.73              | 0.73               | 0.73              | 0.73              |

Notes: Unit of analysis is tower areas for 15-day periods in relative time from tower onair date. Coverage areas created by a 4km radius around cell phone towers in urban areas and 12km radius in rural areas. Robust standard errors, clustered at the tower level in parentheses. All specifications include tower fixed effects. Estimates significant at the 0.05 (0.10, 0.01) level are marked with at \*\* (\*, \*\*\*). Violent Events based on data on MNF-I SIGACT-III database. Cell tower data provided by Zain Iraq. Population data from LandScan (2008).

**A18. Table: Tower-level results by attack type and period**

| Dependent Variable:                                 | (1)<br>All Attacks | (2)<br>Direct Fire | (3)<br>Indirect Fire | (4)<br>Total IED Attempts |
|-----------------------------------------------------|--------------------|--------------------|----------------------|---------------------------|
| <i>Panel A: Excluding towers built 8/06 to 7/07</i> |                    |                    |                      |                           |
| <i>Post</i>                                         | -0.69***<br>(0.21) | -0.41***<br>(0.11) | -0.094**<br>(0.04)   | -0.18*<br>(0.10)          |
| <i>Post*New</i>                                     | -0.52<br>(0.32)    | -0.069<br>(0.17)   | 0.15**<br>(0.06)     | -0.47***<br>(0.14)        |
| Observations                                        | 22144              | 22144              | 22144                | 22144                     |
| R-squared                                           | 0.72               | 0.61               | 0.34                 | 0.76                      |
| <i>Panel B: Dropping 2008</i>                       |                    |                    |                      |                           |
| <i>Post</i>                                         | -0.38**<br>(0.18)  | -0.28***<br>(0.1)  | -0.056<br>(0.04)     | -0.16*<br>(0.09)          |
| <i>Post*New</i>                                     | -0.67*<br>(0.36)   | -0.17<br>(0.19)    | 0.094*<br>(0.05)     | -0.28**<br>(0.13)         |
| Observations                                        | 28208              | 28208              | 28208                | 28208                     |
| R-squared                                           | 0.79               | 0.69               | 0.31                 | 0.82                      |

Notes: Unit of analysis is tower areas for 15-day periods in relative time from tower onair date. Coverage areas created by a 4km radius around cell phone towers in urban areas and 12km radius in rural areas. New towers are those whose catchment is at least 20% new coverage. Robust standard errors, clustered at the tower level in parentheses. All specifications include tower and quarter fixed effects. Estimates significant at the 0.05 (0.10, 0.01) level are marked with at \*\* (\*, \*\*\*).

### A19: Geographic Spillovers into 4km Ring Around Coverage Areas

#### Panel A: Baseline Displacement Model – No Controls for Attacks within Coverage Area

| Coverage Threshold for 'New' Towers | (1)                | (2)                | (3)               | (4)               | (5)               |
|-------------------------------------|--------------------|--------------------|-------------------|-------------------|-------------------|
|                                     | 10%                | 30%                | 50%               | 70%               | 90%               |
| <i>Post</i>                         | -0.41<br>(0.42)    | -0.57<br>(0.39)    | -0.66*<br>(0.38)  | -0.68*<br>(0.37)  | -0.73**<br>(0.36) |
| <i>Post*New</i>                     | -1.88***<br>(0.53) | -1.70***<br>(0.56) | -1.36**<br>(0.56) | -1.46**<br>(0.58) | -1.28**<br>(0.62) |
| Observations                        | 29,744             | 29,744             | 29,744            | 29,744            | 29,744            |
| Number of Towers                    | 1,859              | 1,859              | 1,859             | 1,859             | 1,859             |
| R-squared                           | 0.82               | 0.82               | 0.82              | 0.82              | 0.82              |

#### Panel B: Controlling for Attacks within Coverage Area

|                  |                    |                  |                 |                  |                 |
|------------------|--------------------|------------------|-----------------|------------------|-----------------|
| <i>Post</i>      | -0.41<br>(0.42)    | -0.41<br>(0.33)  | -0.45<br>(0.32) | -0.45<br>(0.31)  | -0.48<br>(0.31) |
| <i>Post*New</i>  | -1.88***<br>(0.53) | -0.86*<br>(0.49) | -0.71<br>(0.45) | -0.88*<br>(0.47) | -0.78<br>(0.53) |
| Observations     | 29,744             | 29,744           | 29,744          | 29,744           | 29,744          |
| Number of Towers | 1,859              | 1,859            | 1,859           | 1,859            | 1,859           |
| R-squared        | 0.83               | 0.88             | 0.88            | 0.88             | 0.88            |

Notes: Unit of analysis is 4-km wide ring around tower areas for 15-day periods in relative time from tower onair date. Coverage areas are a 4km radius around cell phone towers in urban areas and 12km radius in rural areas. So the ring runs from 4-8km in urban areas and from 12-16km in rural ones. Robust standard errors, clustered at the tower level in parentheses. All specifications include tower and quarter fixed effects. Estimates significant at the 0.05 (0.10, 0.01) level are marked with \* (\*, \*\*\*).
